# Supplementary material for: Simultaneous observation of halogen–lone pair and halogen–π interactions of ferrocene derivatives under cryogenic conditions
Source: Royal Society of Chemistry journal article supplement (doi:10.1039/d3cp01661g), 2023-01-01
Supplement: d3cp01661g1.pdf [file d3cp01661g1.pdf]

Supporting information for

# Simultaneous observation of halogen-lone pair and halogen- $\pi$ interactions of ferrocene derivatives under cryogenic conditions

Nora M. Kreienborg,<sup>a</sup> Felix Otte,<sup>b</sup> Carsten Strohmann,<sup>b</sup> Christian Merten\*<sup>a</sup>

a) Ruhr Universität Bochum  
Fakultät für Chemie und Biochemie, Organische Chemie II  
Universitätsstraße 150  
44801 Bochum, Germany  
christian.merten@ruhr-uni-bochum.de  
www.mertenlab.de

b) Technische Universität Dortmund  
Fakultät für Chemie und Chemische Biologie, Anorganische Chemie  
Otto-Hahn-Straße 6  
44227 Dortmund, Germany

|    |                                             |    |
|----|---------------------------------------------|----|
| 1. | Additional Figures and Tables.....          | 2  |
| 2. | Experimental and computational details..... | 8  |
|    | Cryosolutions experiments .....             | 8  |
|    | Matrix isolation experiments .....          | 8  |
|    | Computational details .....                 | 9  |
| 3. | Crystallographic study .....                | 10 |

## 1. Additional Figures and Tables

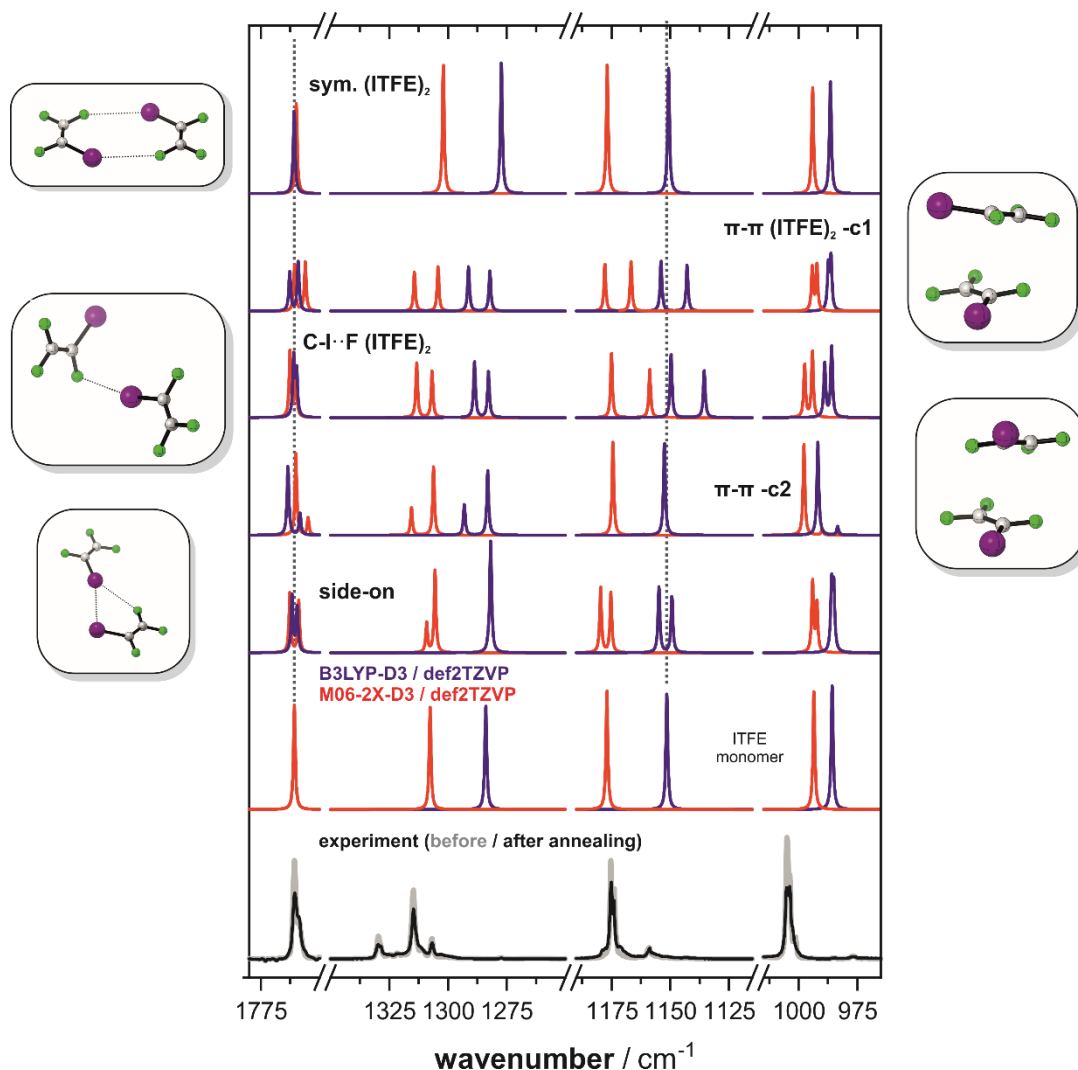

**Figure S1.** Comparison of the experimental MI-IR spectra of ITFE in Argon matrix with those computed for ITFE and  $(ITFE)_2$  at B3LYP-D3/def2TZVP and M06-2X-D3/def2TZVP level of theory. Details on conformer energies are collected in Table S1 below. Please note that the frequency scaling factors were chosen to match the experimental band position of the C=C stretching vibration of ITFE. The side-on structure is considered to match best with the experiment as it shows a splitting into two bands for the C=C ( $\sim 1760\text{ cm}^{-1}$ ) and the C-F stretching mode ( $\sim 1175\text{ cm}^{-1}$ ) and a weak red-shift of the C-F stretching in  $=CF_2$  at  $\sim 1315\text{ cm}^{-1}$ . In the  $\pi$ - $\pi$ - $(ITFE)_2$ -c1, both aforementioned C-F modes split, which is not seen in the experiment (there are no new bands in the  $=CF_2$  stretching region).

**Table S1.** Relative energies of the five considered dimers of ITFE in kcal/mol.

|                                       | B3LYP-D3 / def2TZVP     |                         |            | Single point<br>B3LYP-D3 / def2QZVPP |                         |            | B3LYP-D3BJ / def2TZVP   |                         |            |
|---------------------------------------|-------------------------|-------------------------|------------|--------------------------------------|-------------------------|------------|-------------------------|-------------------------|------------|
|                                       | $\Delta E_{\text{pot}}$ | $\Delta E_{\text{ZPC}}$ | $\Delta H$ | $\Delta E_{\text{pot}}$              | $\Delta E_{\text{ZPC}}$ | $\Delta H$ | $\Delta E_{\text{pot}}$ | $\Delta E_{\text{ZPC}}$ | $\Delta H$ |
| $\pi$ - $\pi$ (ITFE) <sub>2</sub> -c1 | 0.00                    | 0.00                    | 0.00       | 0.0                                  | 0.0                     | 0.0        | 0.0                     | 0.0                     | 0.0        |
| $\pi$ - $\pi$ (ITFE) <sub>2</sub> -c2 | 0.4                     | 0.4                     | 0.4        | 0.5                                  | 0.4                     | 0.5        | 0.6                     | 0.6                     | 0.6        |
| C-I··F                                | 1.7                     | 1.6                     | 1.7        | 1.5                                  | 1.4                     | 1.5        | 1.6                     | 1.5                     | 1.6        |
| Side-on (ITFE) <sub>2</sub>           | 2.3                     | 2.0                     | 1.8        | 1.9                                  | 1.7                     | 1.5        | 1.7                     | 1.5                     | 1.3        |
| symmetric (ITFE) <sub>2</sub>         | 2.4                     | 2.2                     | 2.0        | 2.1                                  | 1.8                     | 1.6        | 2.2                     | 2.0                     | 1.8        |

|                                       | M06-2X-D3 / def2TZVP    |                         |            | Single point<br>M06-2X-D3 / def2QZVPP |                         |            |
|---------------------------------------|-------------------------|-------------------------|------------|---------------------------------------|-------------------------|------------|
|                                       | $\Delta E_{\text{pot}}$ | $\Delta E_{\text{ZPC}}$ | $\Delta H$ | $\Delta E_{\text{pot}}$               | $\Delta E_{\text{ZPC}}$ | $\Delta H$ |
| $\pi$ - $\pi$ (ITFE) <sub>2</sub> -c1 | 0.0                     | 0.0                     | 0.0        | 0.0                                   | 0.0                     | 0.0        |
| $\pi$ - $\pi$ (ITFE) <sub>2</sub> -c2 | 0.6                     | 0.6                     | 0.6        | 0.6                                   | 0.6                     | 0.6        |
| C-I··F                                | 2.4                     | 2.3                     | 2.4        | 2.2                                   | 2.0                     | 2.1        |
| Side-on (ITFE) <sub>2</sub>           | 2.9                     | 2.7                     | 2.5        | 2.4                                   | 2.2                     | 2.0        |
| symmetric (ITFE) <sub>2</sub>         | 3.3                     | 3.0                     | 3.2        | 2.9                                   | 2.6                     | 2.8        |

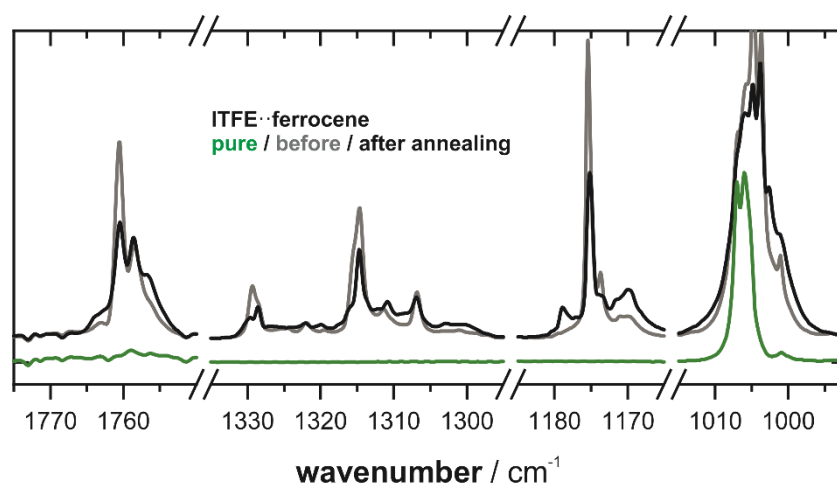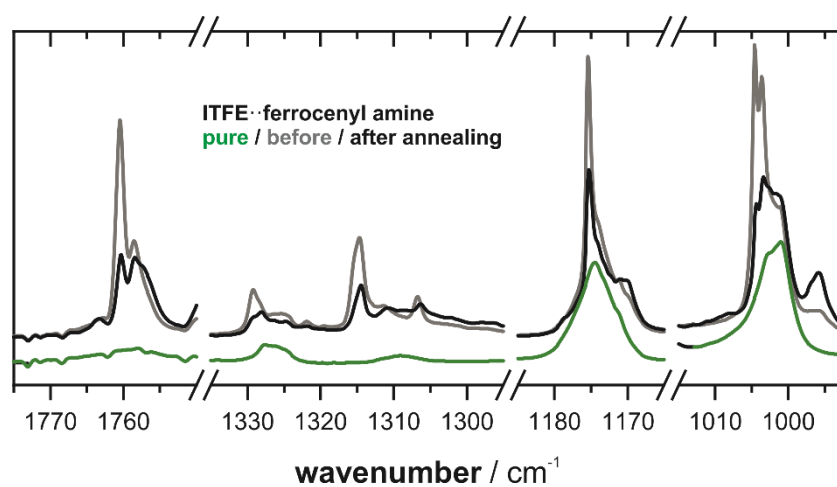**Figure S2.** The matrix isolation spectra of ferrocene·ITFE and (N,N-dimethyl ferrocenyl amine)·ITFE in the range of the four main ITFE bands.

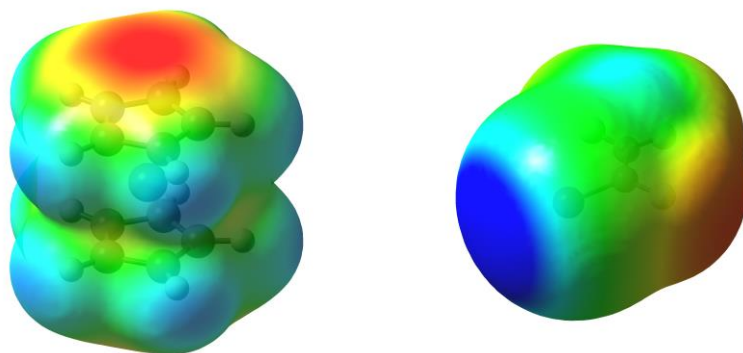

**Figure S3.** Electrostatic potential maps of ferrocene and ITFE obtained mapping the electrostatic potential on the electron density using iso-values of  $6e-4$  and  $1e-5$  on a scale from  $-2.5e-2$  (red) to  $2.5e-2$  (blue) and  $-1e-2$  (red) to  $1e-2$  (blue).

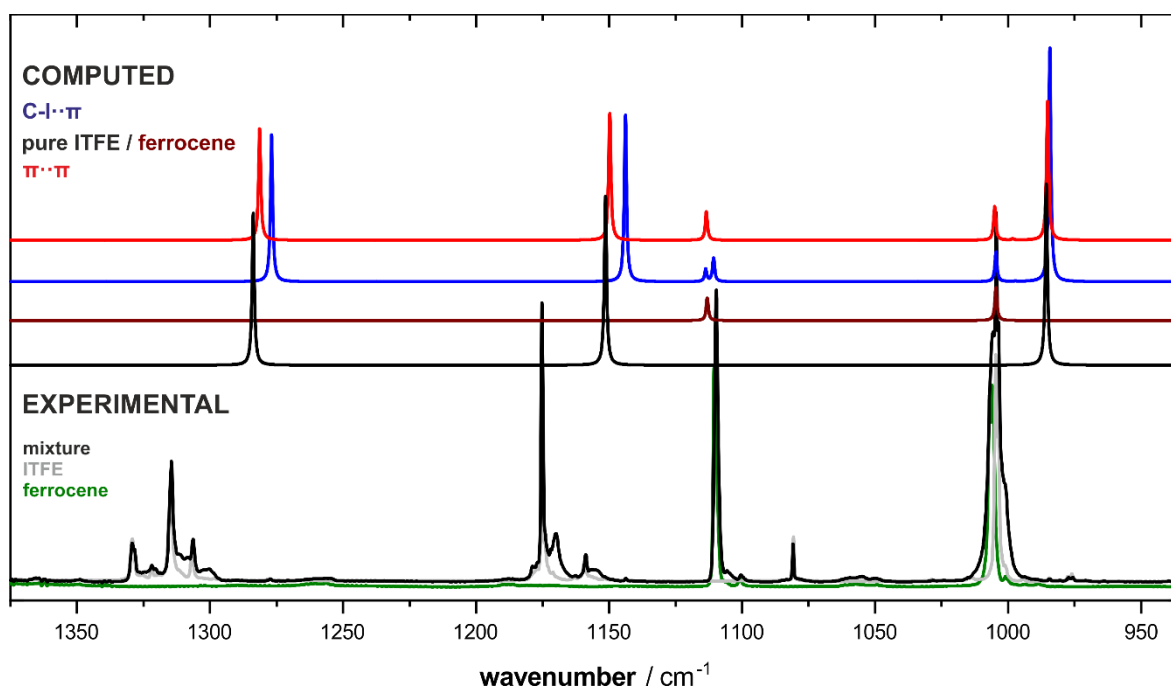

**Figure S4.** Comparison of the experimental MI-IR spectra of ferrocene/ITFE in Argon matrix with those computed for ferrocene·ITFE.

**Table S2.** Computed relative enthalpies of ferrocenyl amine and its XB-complex with ITFE computed at difference levels of theory. Energies are given in kcal/mol.

|                   | B3LYP-D3 / def2TZVP     |                         |            | Single point<br>B3LYP / def2QZVPP |                         |            | M062X-D3 / def2TZVP     |                         |            | Single point<br>M062X / def2QZVPP |                         |            |
|-------------------|-------------------------|-------------------------|------------|-----------------------------------|-------------------------|------------|-------------------------|-------------------------|------------|-----------------------------------|-------------------------|------------|
|                   | $\Delta E_{\text{pot}}$ | $\Delta E_{\text{ZPC}}$ | $\Delta H$ | $\Delta E_{\text{pot}}$           | $\Delta E_{\text{ZPC}}$ | $\Delta H$ | $\Delta E_{\text{pot}}$ | $\Delta E_{\text{ZPC}}$ | $\Delta H$ | $\Delta E_{\text{pot}}$           | $\Delta E_{\text{ZPC}}$ | $\Delta H$ |
| C1                | 0.00                    | 0.18                    | 0.15       | 0.00                              | 0.18                    | 0.15       | 0.00                    | 0.00                    | 0.00       | 0.00                              | 0.06                    | 0.02       |
| C2                | 0.04                    | <b>0.00</b>             | 0.00       | 0.03                              | 0.00                    | 0.00       | 0.22                    | 0.02                    | 0.05       | 0.14                              | 0.00                    | 0.00       |
| C1 C-I··N         | 0.00                    | 0.00                    | 0.00       | 0.00                              | 0.00                    | 0.00       | 0.23                    | 0.05                    | 0.08       | 0.19                              | 0.01                    | 0.04       |
| C2 C-I··N         | 0.09                    | 0.26                    | 0.25       | 0.07                              | 0.24                    | 0.23       | 0.00                    | 0.00                    | 0.00       | 0.00                              | 0.00                    | 0.00       |
| C1 C-I·· $\pi$    | 4.22                    | 4.01                    | 4.13       | 4.25                              | 4.03                    | 4.15       | 3.04                    | 2.85                    | 2.92       | 3.09                              | 2.90                    | 2.97       |
| C2 C-I·· $\pi$    | 5.70                    | 5.07                    | 5.36       | 5.62                              | 4.99                    | 5.28       | 4.82                    | 4.23                    | 4.49       | 4.69                              | 4.10                    | 4.36       |
| C1 $\pi$ ·· $\pi$ | 4.11                    | 3.81                    | 3.89       | 4.48                              | 4.18                    | 4.26       | 3.24                    | 3.08                    | 3.03       | 3.54                              | 3.38                    | 3.33       |
| C2 $\pi$ ·· $\pi$ | 4.38                    | 4.24                    | 4.33       | 4.81                              | 4.67                    | 4.76       | 3.11                    | 3.05                    | 3.00       | 3.57                              | 3.51                    | 3.46       |

**Tabl. S3.** Formation enthalpies of (ferrocenyl amine)··ITFE complexes obtained by  $\Delta H_{\text{formation}} = H(\text{Cx XBonded}) - H(\text{Cx}) - H(\text{ITFE})$  with  $x$  indicating the pure donor's conformer. Energies are in kcal/mol.

|    |                | $\Delta H_{\text{formation}}$ |           |
|----|----------------|-------------------------------|-----------|
|    |                | B3LYP-D3                      | M06-2X-D3 |
| C1 | C-I··N         | -8.91                         | -8.13     |
| C2 | C-I··N         | -8.8                          | -8.16     |
| C1 | C-I·· $\pi$    | -3.55                         | -3.72     |
| C2 | C-I·· $\pi$    | -4.93                         | -5.24     |
| C1 | $\pi$ ·· $\pi$ | -5.02                         | -5.19     |
| C2 | $\pi$ ·· $\pi$ | -4.73                         | -5.16     |

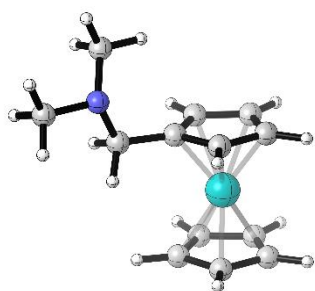

Ferrocenyl amine C1 (0.00)

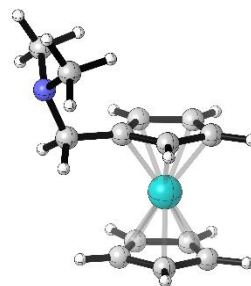

Ferrocenyl amine C2 (0.15)

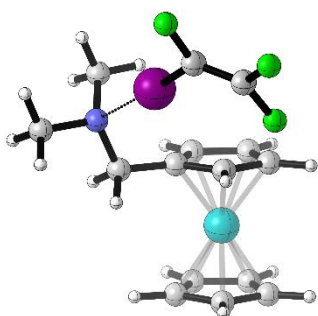

C1 (C-I $\cdots$ N)

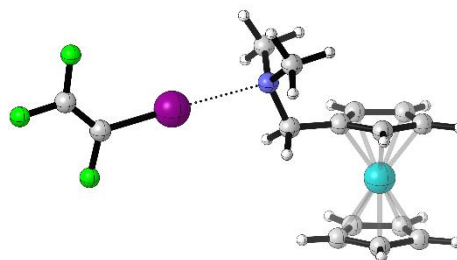

C2 (C-I $\cdots$ N)

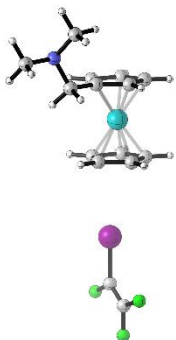

C1 (C-I $\cdots$  $\pi$ ) preferred to bottom Cp

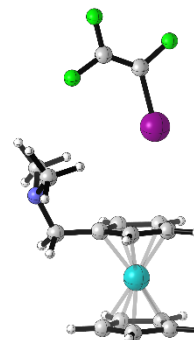

C2 (C-I $\cdots$  $\pi$ ) preferred to top Cp

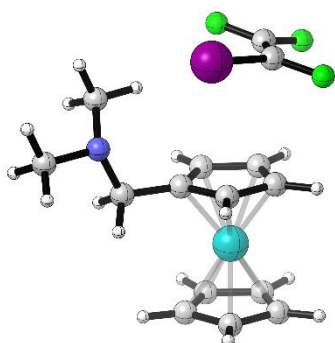

C1 ( $\pi\cdots\pi$ )

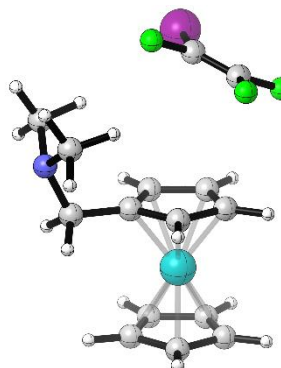

C2 ( $\pi\cdots\pi$ )

**Figure S5.** Structures of the computed (ferrocenyl amine) $\cdots$ ITFE complexes. For the (ferrocenyl amine) monomers, the relative  $\Delta H$  is given in parenthesis.

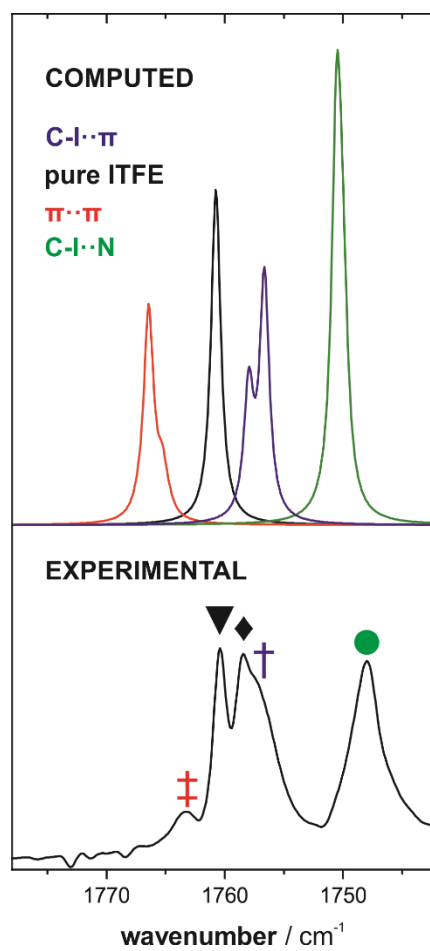

**Figure S6.** Comparison of the experimental MI-IR spectra of ferrocenyl amine/ITFE in Argon matrix with those computed for (ferrocenyl amine)·ITFE at B3LYP-D3/def2TZVP level of theory.

## 2. Experimental and computational details

ITFE was purchased from ABCR, Germany. All other compounds were purchased from Sigma Aldrich, Germany. All substances were used without further purification. Xenon gas (4.8, halogen-free) and Argon gas (99.9%) were obtained from AirLiquide.

### Cryosolutions experiments

A stainless-steel IR transmission cell with BaF<sub>2</sub> windows and 7 mm pathlength was used. The cell was connected to a gas manifold. For the experiments with ferrocene and ferrocenyl amine, the compounds (exact amounts cf. Table S3) were dissolved in pentane and injected into the cell. The pentane was removed under reduced pressure at room temperature and pressurized by addition of Xenon gas, or it was continued with the sample preparation of ITFE. For the measurements of mixtures with ITFE, gas mixtures of ITFE with xenon were prepared at room temperature ( $p(\text{ITFE}) = 0.55 \text{ mbar} = \sim 1.7 \text{ mol}$ ;  $p_{\text{Xe}} \approx 3.75 \text{ bar}$ ). While still connected to the gas manifold, the transmission cell was cooled down to 173 K with a Janis ST100 liquid-nitrogen cryostat, which led to partial condensation of the gas mixture and a reduction of the system pressure. The system was subsequently pressurized to a total system pressure of 3.5, 3.75 and 4.0 bar respectively by addition of Xenon gas.

**Table S4.** Experimental conditions for cryosolutions experiments

| experiment              | p(ITFE)/n(ITFE)                 | m(compound)/n(compound)       | p(Xe)    | T   |
|-------------------------|---------------------------------|-------------------------------|----------|-----|
| ITFE                    | 0.55 mbar / 1.7 $\mu\text{mol}$ | - n/a -                       | 4 bar    | 173 |
| Ferrocene               | - n/a -                         | 2.0 mg / 10.8 $\mu\text{mol}$ | 4 bar    | 178 |
| Ferrocene + ITFE        | 0.55mbar/ 1.7 $\mu\text{mol}$   | 2.0 mg /10.8 $\mu\text{mol}$  | 4 bar    | 173 |
| Ferrocenyl amine        | - n/a -                         | 1.19 mg/5.1 $\mu\text{mol}$   | 3.75 bar | 173 |
| Ferrocenyl amine + ITFE | 0.545 mbar/ 1.7 $\mu\text{mol}$ | 1.2mg /5.1 $\mu\text{mol}$    | 3.5 bar  | 173 |

### Matrix isolation experiments

Argon matrices were obtained on a BaF<sub>2</sub> window held at a temperature of 20 K and utilizing an argon flow of 1.66 sccm. In case of ferrocene, the sample was sublimed from a previously degassed sample flask at a temperature of 55°C. Ferrocenyl amine was evaporated sublimated from a previously degassed sample flask at a temperature of 50°C. In both experiments, all transfer lines to the cold head were heated to 5°C above the sample temperature by means of a heating tap. For all experiments with ITFE, a gas mixture of ITFE and argon (the matrix host) was prepared with an approximate ratio of 1:1800 (ITFE:Argon). Annealing was carried out by slowly heating the matrix to 35 K and completed when no change of the IR spectrum could be observed anymore.

**Table S5.** Experimental conditions for matrix isolation experiments

| experiment              | Duration of depositon | Deposition temperature | Gas(mixture)    | Sample |
|-------------------------|-----------------------|------------------------|-----------------|--------|
| ITFE                    | 3:02h                 | 20K                    | 1.1 : 1850 mbar | X      |
| Ferrocene               | 48min                 | 20K                    |                 | 55°C   |
| Ferrocene + ITFE        | 49 min                | 20K                    | 1.1 : 1813 mbar | 55°C   |
| Ferrocenyl amine        | 3:38h                 | 20K                    |                 | 50°C   |
| Ferrocenyl amine + ITFE | 2:26h                 | 20K                    | 1 : 1809 mbar   | 50°C   |



## Computational details

All calculations were carried out using Gaussian 09 Rev E.01,<sup>1</sup> three-dimensional structures were rendered using CylView.<sup>2</sup> For all calculations, dispersion was accounted for by employing the D3 (and in case of B3LYP also D3BJ) correction.<sup>3</sup> IR spectra were simulated by assigning a Lorentzian band width of 0.5 cm<sup>-1</sup> half-width at half-height to the computed dipole strength. The frequency scaling factor, that is employed to account for deviations in frequencies due to the applied harmonic approximation, was set to 0.979 (B3LYP-D3) and 0.944 (M06-2X-D3) in order to match the experimental band position of the C=C stretching vibration of ITFE.

1. Gaussian 09, Rev E.01, M. J. Frisch, G. W. Trucks, H. B. Schlegel, G. E. Scuseria, M. A. Robb, J. R. Cheeseman, G. Scalmani, V. Barone, B. Mennucci, G. A. Petersson, H. Nakatsuji, M. Caricato, X. Li, H. P. Hratchian, A. F. Izmaylov, J. Bloino, G. Zheng, J. L. Sonnenberg, M. Hada, M. Ehara, K. Toyota, R. Fukuda, J. Hasegawa, M. Ishida, T. Nakajima, Y. Honda, O. Kitao, H. Nakai, T. Vreven, J. J. A. Montgomery, J. E. Peralta, F. Ogliaro, M. Bearpark, J. J. Heyd, E. Brothers, K. N. Kudin, V. N. Staroverov, T. Keith, R. Kobayashi, J. Normand, K. Raghavachari, A. Rendell, J. C. Burant, S. S. Iyengar, J. Tomasi, M. Cossi, N. Rega, J. M. Millam, M. Klene, J. E. Knox, J. B. Cross, V. Bakken, C. Adamo, J. Jaramillo, R. Gomperts, R. E. Stratmann, O. Yazyev, A. J. Austin, R. Cammi, C. Pomelli, J. W. Ochterski, R. L. Martin, K. Morokuma, V. G. Zakrzewski, G. A. Voth, P. Salvador, J. J. Dannenberg, S. Dapprich, A. D. Daniels, O. Farkas, J. B. Foresman, J. V. Ortiz, J. Cioslowski and D. J. Fox, Wallingford CT, USA, 2013
2. CYLview 1.0b, C. Y. Legault, Université de Sherbrooke, 2009
3. S. Grimme, *Chem. Eur. J.*, 2012, **18**, 9955-9964.

### 3. Crystallographic study

Crystals of the adduct (ferrocenyl amine)-ITFE were grown under exclusion of air and moisture by first dissolving ITFE (0.05 mL, 0.50 mmol, 1.00 eq.; pre-cooled to -40 °C) in dry n-pentane at -40 °C. Afterwards, N,N-dimethyl ferrocenyl amine (0.2 mL, 1.00 mmol, 2.00 eq.) was added. The sample was first kept in the -30 °C freezer, then moved to the -80 °C freezer until yellow plates formed.

A suitable crystal was selected and analyzed on a Bruker APEX-II CCD diffractometer. The crystal was kept at 100 K during data collection. Using Olex2<sup>4</sup>, the structure was solved with the XT structure solution program<sup>5</sup> using Intrinsic Phasing and refined with the XL refinement package<sup>6</sup> using Least Squares minimisation.

4. O.V. Dolomanov et al., *J. Appl. Cryst.* 2009, **42**, 339-341.
5. G. M. Sheldrick, *Acta Cryst.*, 2015, **A71**, 3-8.
6. G. M. Sheldrick, *Acta Cryst.* 2008, **A64**, 112-122.

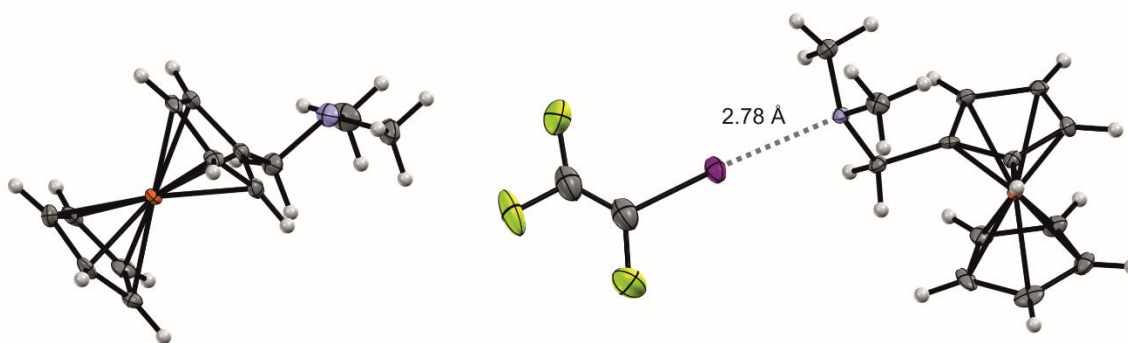

The addition of excess ferrocenyl amine led to the formation of crystals with a 2:1 ratio of XB-acceptor and -donor. The XB is formed with ferrocenyl amine in C2 conformation (cf. Fig. S5), while the other ferrocenyl amine adopts C1.

**Table S6.** Crystal data and structure refinement.

|                                             |                                                                                |
|---------------------------------------------|--------------------------------------------------------------------------------|
| CCSD no.                                    | 2252978                                                                        |
| Empirical formula                           | C <sub>28</sub> H <sub>34</sub> F <sub>3</sub> Fe <sub>2</sub> IN <sub>2</sub> |
| Formula weight                              | 694.17                                                                         |
| Temperature/K                               | 100                                                                            |
| Crystal system                              | orthorhombic                                                                   |
| Space group                                 | P2 <sub>1</sub> 2 <sub>1</sub> 2 <sub>1</sub>                                  |
| a/Å                                         | 5.7701(4)                                                                      |
| b/Å                                         | 11.1748(8)                                                                     |
| c/Å                                         | 42.916(3)                                                                      |
| α/°                                         | 90                                                                             |
| β/°                                         | 90                                                                             |
| γ/°                                         | 90                                                                             |
| Volume/Å <sup>3</sup>                       | 2767.2(3)                                                                      |
| Z                                           | 4                                                                              |
| ρ <sub>calc</sub> /cm <sup>3</sup>          | 1.666                                                                          |
| μ/mm <sup>-1</sup>                          | 2.204                                                                          |
| F(000)                                      | 1392.0                                                                         |
| Crystal size/mm <sup>3</sup>                | 0.306 × 0.236 × 0.172                                                          |
| Radiation                                   | MoKα (λ = 0.71073)                                                             |
| 2θ range for data collection/°              | 4.626 to 53.998                                                                |
| Index ranges                                | -7 ≤ h ≤ 7, -15 ≤ k ≤ 15, -57 ≤ l ≤ 58                                         |
| Reflections collected                       | 5989                                                                           |
| Independent reflections                     | 5989 [R <sub>int</sub> = 0.0612, R <sub>sigma</sub> = 0.0281]                  |
| Data/restraints/parameters                  | 5989/0/329                                                                     |
| Goodness-of-fit on F <sup>2</sup>           | 1.146                                                                          |
| Final R indexes [I >= 2σ (I)]               | R <sub>1</sub> = 0.0327, wR <sub>2</sub> = 0.0677                              |
| Final R indexes [all data]                  | R <sub>1</sub> = 0.0366, wR <sub>2</sub> = 0.0687                              |
| Largest diff. peak/hole / e Å <sup>-3</sup> | 1.67/-0.60                                                                     |
| Flack parameter                             | -0.010(9)                                                                      |

**Table S7.** Fractional Atomic Coordinates ( $\times 10^4$ ) and Equivalent Isotropic Displacement Parameters ( $\text{\AA}^2 \times 10^3$ ).  $U_{\text{eq}}$  is defined as 1/3 of the trace of the orthogonalised  $U_{\text{H}}$  tensor.

| Atom | <i>x</i>   | <i>y</i>  | <i>z</i>   | $U(\text{eq})$ |
|------|------------|-----------|------------|----------------|
| I1   | 5567.3(7)  | 7108.1(3) | 5644.5(2)  | 22.58(9)       |
| Fe1  | 7153.3(12) | 8459.2(6) | 7161.6(2)  | 10.07(14)      |
| F1   | 1743(8)    | 5739(4)   | 5342.7(11) | 52.9(12)       |
| F2   | 3714(9)    | 5288(4)   | 4793.2(9)  | 53.8(13)       |
| F3   | 6918(9)    | 6219(5)   | 4935.4(11) | 66.2(15)       |
| N1   | 7321(7)    | 8553(4)   | 6116.4(9)  | 12.8(8)        |
| C1   | 7438(8)    | 8839(4)   | 6696.4(11) | 11.0(9)        |
| C2   | 9676(9)    | 8862(4)   | 6841.3(11) | 13(1)          |
| C3   | 9648(10)   | 9738(4)   | 7082.1(11) | 15(1)          |
| C4   | 7371(9)    | 10262(4)  | 7087.8(12) | 16.2(11)       |
| C5   | 6036(9)    | 9713(4)   | 6848.2(11) | 11.7(10)       |
| C6   | 5683(11)   | 6801(4)   | 7197.3(12) | 19.8(11)       |
| C7   | 7909(10)   | 6805(4)   | 7338.2(13) | 19.3(11)       |
| C8   | 7872(10)   | 7676(5)   | 7581.3(12) | 17.6(11)       |
| C9   | 5645(11)   | 8204(4)   | 7588.6(11) | 18.9(11)       |
| C10  | 4309(11)   | 7660(5)   | 7350.2(12) | 21.0(11)       |
| C11  | 6741(8)    | 8062(4)   | 6425.1(11) | 13.1(10)       |
| C12  | 9811(9)    | 8668(5)   | 6067.7(12) | 17.2(11)       |
| C13  | 6176(10)   | 9703(4)   | 6058.5(12) | 17.7(11)       |
| C14  | 3948(13)   | 6127(5)   | 5284.1(15) | 35.5(16)       |
| C15  | 4805(15)   | 5898(6)   | 5021.3(17) | 41.2(18)       |
| Fe2  | 6128.1(12) | 1314.2(6) | 3591.8(2)  | 10.38(15)      |
| N2   | 9959(8)    | 2753(4)   | 4401.2(10) | 21.3(10)       |
| C16  | 7679(9)    | 2313(4)   | 3929.8(11) | 13.4(10)       |
| C17  | 5407(9)    | 2754(4)   | 3866.8(11) | 14.6(9)        |
| C18  | 5324(9)    | 3095(4)   | 3545.0(11) | 13.7(10)       |
| C19  | 7542(9)    | 2851(5)   | 3412.3(11) | 16.3(10)       |
| C20  | 8976(9)    | 2382(4)   | 3649.5(11) | 14.7(10)       |
| C21  | 5774(10)   | -376(4)   | 3773.1(13) | 19.5(11)       |
| C22  | 3597(9)    | 83(4)     | 3673.6(12) | 16.6(11)       |
| C23  | 3705(9)    | 339(4)    | 3351.5(13) | 17.0(11)       |
| C24  | 5986(10)   | 45(4)     | 3249.5(13) | 18.5(11)       |
| C25  | 7246(10)   | -396(4)   | 3507.0(13) | 18.0(11)       |
| C26  | 8589(10)   | 1849(5)   | 4234.2(12) | 18.3(11)       |
| C27  | 11279(11)  | 2194(6)   | 4650.0(14) | 32.7(14)       |
| C28  | 8431(11)   | 3677(5)   | 4527.2(13) | 27.4(13)       |

**Table S8.** Anisotropic Displacement Parameters ( $\text{\AA}^2 \times 10^3$ ). The Anisotropic displacement factor exponent takes the form:  $-2\pi^2[h^2a^{*2}U_{11}+2hka^*b^*U_{12}+\dots]$ .

| Atom | U <sub>11</sub> | U <sub>22</sub> | U <sub>33</sub> | U <sub>23</sub> | U <sub>13</sub> | U <sub>12</sub> |
|------|-----------------|-----------------|-----------------|-----------------|-----------------|-----------------|
| I1   | 31.7(2)         | 19.52(16)       | 16.52(16)       | -0.39(14)       | -3.54(16)       | -2.14(16)       |
| Fe1  | 11.5(3)         | 10.3(3)         | 8.4(3)          | 0.4(2)          | 1.0(3)          | -0.5(3)         |
| F1   | 40(3)           | 66(3)           | 53(3)           | -15(2)          | -3(2)           | -21(2)          |
| F2   | 90(4)           | 37(2)           | 34(2)           | -13.9(17)       | -24(2)          | -4(2)           |
| F3   | 69(3)           | 82(4)           | 48(3)           | -32(3)          | 24(3)           | -26(3)          |
| N1   | 14(2)           | 15(2)           | 10(2)           | 0.6(16)         | 1.8(16)         | -4.2(17)        |
| C1   | 8(2)            | 12(2)           | 13(2)           | 4.1(17)         | 1.8(19)         | -2.3(18)        |
| C2   | 11(2)           | 16(2)           | 13(2)           | 0.6(17)         | 1(2)            | -0.7(19)        |
| C3   | 15(2)           | 17(2)           | 12(2)           | 1.1(18)         | 2(2)            | -7(2)           |
| C4   | 19(3)           | 10(2)           | 19(3)           | -3.6(18)        | 3(2)            | -1(2)           |
| C5   | 14(3)           | 10(2)           | 11(2)           | 2.2(17)         | 2(2)            | 1.4(18)         |
| C6   | 34(3)           | 9(2)            | 16(2)           | 2.8(17)         | -2(3)           | -8(2)           |
| C7   | 25(3)           | 12(3)           | 21(3)           | 4.8(19)         | 5(2)            | -1(2)           |
| C8   | 16(3)           | 23(3)           | 14(2)           | 5.9(19)         | -1(2)           | 1(2)            |
| C9   | 24(3)           | 21(3)           | 12(2)           | 3.2(17)         | 5(2)            | 1(2)            |
| C10  | 20(3)           | 27(3)           | 16(2)           | 15(2)           | 0(2)            | 2(2)            |
| C11  | 15(2)           | 12(2)           | 13(2)           | 1.4(18)         | 4.0(19)         | 0.0(18)         |
| C12  | 17(3)           | 19(2)           | 16(2)           | -1(2)           | 3(2)            | -2(2)           |
| C13  | 19(3)           | 18(3)           | 16(3)           | 4.1(19)         | -3(2)           | 0(2)            |
| C14  | 49(4)           | 26(3)           | 32(4)           | -1(2)           | -6(3)           | -4(3)           |
| C15  | 59(5)           | 28(3)           | 36(4)           | -5(3)           | -6(4)           | -4(3)           |
| Fe2  | 10.7(3)         | 8.1(3)          | 12.3(3)         | -0.4(2)         | -1.2(3)         | -0.8(2)         |
| N2   | 24(3)           | 27(2)           | 13(2)           | 2.5(18)         | -4.0(17)        | -5.8(19)        |
| C16  | 14(2)           | 10(2)           | 16(2)           | -2.2(18)        | -0.6(19)        | -2.6(19)        |
| C17  | 16(2)           | 11(2)           | 17(2)           | -4.2(18)        | 0(2)            | 1(2)            |
| C18  | 19(2)           | 9(2)            | 13(2)           | 3.8(17)         | 0(2)            | -3.1(19)        |
| C19  | 26(3)           | 9(2)            | 14(2)           | -0.5(19)        | 2(2)            | -7(2)           |
| C20  | 16(3)           | 12(2)           | 16(2)           | -3.6(17)        | 1(2)            | -3.5(18)        |
| C21  | 22(3)           | 11(2)           | 25(3)           | 5.2(19)         | -2(2)           | -3(2)           |
| C22  | 17(3)           | 12(2)           | 21(3)           | -0.6(19)        | 4(2)            | -5.2(19)        |
| C23  | 16(3)           | 14(2)           | 21(3)           | -4.7(19)        | -7(2)           | -4(2)           |
| C24  | 21(3)           | 15(2)           | 20(3)           | -7.0(19)        | 4(2)            | -1(2)           |
| C25  | 13(3)           | 10(2)           | 31(3)           | -5(2)           | -4(2)           | -1.0(19)        |
| C26  | 21(3)           | 20(3)           | 14(2)           | 1.6(18)         | -2(2)           | -2(2)           |
| C27  | 33(3)           | 43(4)           | 22(3)           | 8(3)            | -13(3)          | -10(3)          |
| C28  | 39(4)           | 27(3)           | 16(3)           | -4(2)           | 3(2)            | -9(3)           |
